1 **Title**

2 **Neolithic and Medieval virus genomes reveal complex evolution of Hepatitis B**

3

4 **Authors**

5 Ben Krause-Kyora<sup>1,2,†</sup>, Julian Susat<sup>1</sup>, Felix M. Key<sup>2</sup>, Denise Kühnert<sup>3</sup>, Esther Bosse<sup>1,4</sup>,  
6 Alexander Immel<sup>1,2</sup>, Christoph Rinne<sup>5</sup>, Sabin-Christin Kornell<sup>1</sup>, Diego Yepes<sup>4</sup>, Sören  
7 Franzenburg<sup>1</sup>, Henrike O. Heyne<sup>6</sup>, Thomas Meier<sup>7</sup>, Sandra Lösch<sup>8</sup>, Harald Meller<sup>9</sup>, Susanne  
8 Friederich<sup>9</sup>, Nicole Nicklisch<sup>9,10</sup>, Kurt Werner Alt<sup>9,10,11,12</sup>, Stefan Schreiber<sup>1,13</sup>, Andreas  
9 Tholey<sup>4</sup>, Alexander Herbig<sup>2</sup>, Almut Nebel<sup>1</sup>, Johannes Krause<sup>2,†</sup>

10

11 **Affiliations**

12 <sup>1</sup>Institute of Clinical Molecular Biology, Kiel University, Kiel, Germany.

13 <sup>2</sup>Max Planck Institute for the Science of Human History, Jena, Germany.

14 <sup>3</sup>Division of Infectious Diseases and Hospital Epidemiology, University Hospital Zurich, Zurich,  
15 Switzerland

16 <sup>4</sup>Systematic Proteomics & Bioanalytics, Institute for Experimental Medicine, Kiel University, Kiel,  
17 Germany.

18 <sup>5</sup>Institute of Pre- and Protohistoric Archaeology, Kiel University, Kiel, Germany.

19 <sup>6</sup>Broad Institute, Stanley Center for Psychiatric Research, Cambridge, MA, USA.

20 <sup>7</sup>Institute for Pre- and Protohistory and Near Eastern Archaeology, Heidelberg University, Heidelberg,  
21 Germany.

22 <sup>8</sup>Department of Physical Anthropology, Institute of Forensic Medicine, University of Bern, Bern,  
23 Switzerland.

24 <sup>9</sup>State Office for Heritage Management and Archaeology Saxony-Anhalt and State Museum of  
25 Prehistory, Halle, Germany.

26 <sup>10</sup>Danube Private University, Krems, Austria.

27 <sup>11</sup>Department of Biomedical Engineering, University Hospital Basel, University of Basel, Basel,  
28 Switzerland.

29 <sup>12</sup>Integrative Prehistory and Archaeological Science, University of Basel, Basel, Switzerland.

30 <sup>13</sup>Clinic for Internal Medicine I, University Hospital of Schleswig-Holstein, Kiel, Germany.

31

32 †Corresponding author E-mails: [b.krause-kyora@ikmb.uni-kiel.de](mailto:b.krause-kyora@ikmb.uni-kiel.de), [krause@shh.mpg.de](mailto:krause@shh.mpg.de)

33

34 **Abstract**

35 The hepatitis B virus (HBV) is one of the most widespread human pathogens known today,  
36 yet its origin and evolutionary history are still unclear and controversial. Here, we report the  
37 analysis of three ancient HBV genomes recovered from human skeletons found at three  
38 different archaeological sites in Germany. We reconstructed two Neolithic and one medieval  
39 HBV genomes by *de novo* assembly from shotgun DNA sequencing data. Additionally, we  
40 observed HBV-specific peptides using paleo-proteomics. Our results show that HBV  
41 circulates in the European population for at least 7000 years. The Neolithic HBV genomes  
42 show a high genomic similarity to each other. In a phylogenetic network, they do not group  
43 with any human-associated HBV genome and are most closely related to those infecting  
44 African non-human primates. These ancient virus forms appear to represent distinct lineages  
45 that have no close relatives today and went possibly extinct. Our results reveal the great  
46 potential of ancient DNA from human skeletons in order to study the long-time evolution of  
47 blood borne viruses.

48

49

## 50 **Introduction**

51 The hepatitis B virus (HBV) is one of the most widespread human pathogens, with one third  
52 of the world population being infected, and an annual death toll of about 1 million globally  
53 (WHO, 2017). Infection of liver cells with HBV leads to acute hepatitis B, which is self-  
54 limiting in about 90-95% of cases. In about 5-10% of infected individuals virus clearance fails  
55 and patients develop chronic infection of hepatitis B, which puts them at lifelong elevated risk  
56 for liver cirrhosis and liver cancer (hepatocellular carcinoma). HBV is usually transmitted by  
57 contact with infectious blood, in highly endemic countries often during birth (WHO, 2017).

58 HBV has a circular, partially double-stranded DNA genome of about 3.2kbp that encodes four  
59 overlapping open reading frames (P, pre-S/S, pre-C/C, and X). Based on the genomic  
60 sequence diversity, HBVs are currently classified into 8 genotypes (A-H) and numerous  
61 subgenotypes that show distinct geographic distributions (Castelhano et al., 2017). All  
62 genotypes are hypothesised to be primarily the result of recombination events (Littlejohn et  
63 al., 2016; Simmonds and Midgley, 2005). To a lesser extent, HBV evolution is also driven by  
64 the accumulation of point mutations (Schaefer 2007, Araujo 2015).

65 Despite being widespread and well-studied, the origin and evolutionary history of HBV is still  
66 unclear and controversial (Littlejohn et al., 2016, Souza et al., 2014). HBVs in non-human  
67 primates (NHP), for instance in chimpanzees and gorillas, are phylogenetically closely related  
68 to, and yet distinct from, human HBV isolates, supporting the notion of an Africa origin of the  
69 virus (Souza et al., 2014). Molecular-clock based analyses dating the origin of HBV have  
70 resulted in conflicting estimates with some as recent as about 400 years ago (Zhou and  
71 Holmes, 2007, Souza et al., 2014). These observations have raised doubts about the suitability  
72 of molecular dating approaches for reconstructing the evolution of HBV (Bouckaer et al.,  
73 2103, Souza et al., 2014). Moreover, ancient DNA (aDNA) research on HBV-infected  
74 mummies from the 16<sup>th</sup> century AD revealed a very close relationship between the ancient  
75 and modern HBV genomes (Kahila Bar-Gal et al., 2012, Patterson Ross et al., 2018),  
76 indicating a surprising lack of temporal genetic changes in the virus during the last 500 years  
77 (Patterson Ross et al., 2018). Therefore, diachronic aDNA HBV studies, in which both the  
78 changes in the viral genome over time as well as the provenance and age of the archaeological  
79 samples, are needed to better understand the origin and evolutionary history of the virus.

80 Here, we report the analysis of three complete HBV genomes recovered from human skeletal  
81 remains from the prehistoric Neolithic and Medieval Periods in Central Europe. Our results  
82 show that HBV already circulated in the European population more than 7000 years ago.

83 Although the ancient forms show a relationship to modern isolates they appear to represent  
84 distinct lineages that have no close modern relatives and are possibly extinct today.  
85

## 86 **Results and Discussion**

87 We detected evidence for presence of ancient HBV in three human tooth samples as part of a  
88 metagenomic screening for viral pathogens that was performed on shotgun sequencing data  
89 from 53 skeletons using the metagenomic alignment software MALT (Vagene et al., 2018).  
90 The remains of the individuals were excavated from the Neolithic sites of Karsdorf  
91 (Linearbandkeramik [LBK], 5056–4959 cal BC) and Sorsum (Tiefstichkeramik group of the  
92 Funnel Beaker culture, 3335-3107 cal BC), the medieval cemetery of Petersberg/Kleiner  
93 Madron (1020-1116 cal AD), all located in Germany (Fig. A, figure supplementary S1-S3).  
94 After the three aDNA extracts had appeared HBV-positive in the initial virus screening, they  
95 were subjected to deep-sequencing without any prior enrichment resulting in 367 to 419  
96 million reads per sample (table 1). Analysis of the human DNA recovered from Karsdorf (3-  
97 fold coverage), Sorsum (1.2-fold coverage) and Petersberg (2.9-fold coverage) showed  
98 genetic affinities of the individuals to LBK, Funnel Beaker from Sweden and medieval human  
99 populations, respectively (figure supplementary S9-S11), which is in agreement with the  
100 archeological evidence. The results of the human population genetic investigation as well as  
101 the typical aDNA deamination patterns in the recovered human and HBV sequences  
102 (supplementary, figure supplementary S4-S5) support the ancient origin of the obtained  
103 dataset.

104 For successful HBV genome reconstruction, we mapped all metagenomic sequences to 16  
105 HBV reference genomes (8 human genotypes (A-H) and 8 NHPs from Africa and Asia) that  
106 are representative of the current HBV strain diversity (supplementary, table supplementary  
107 S6). The mapped reads were used for a *de novo* assembly, resulting in contigs from which one  
108 ancient HBV consensus sequence per sample was constructed. The consensus genomes are  
109 3161 (46-fold coverage), 3182 (47-fold coverage), and 3183 (105-fold coverage) nucleotides  
110 in length, which falls in the length range of modern HBV genomes and suggests that we  
111 successfully reconstructed the entire ancient HBV genomes (table 1, figure supplementary S6-  
112 S8). Further, when we conducted liquid chromatography-mass spectrometry (LC-MS) based  
113 bottom-up proteomics on tooth material from the three individuals, we identified in the  
114 Karsdorf and Petersberg samples a peptide that is part of the very stable HBV core protein,  
115 supporting the presence and active replication of HBV in the individuals' blood  
116 (supplementary, figure supplementary S16).

117 Phylogenetic network analysis was carried out with a dataset comprised of 495 modern HBV  
118 strains representing the full genetic diversity. Strikingly, the Neolithic HBV genomes did not  
119 group with any human strain in the phylogeny. Instead, they branched off in two clades and

120 were most closely related to the African non-human primates (NHP) genomes (Fig. B, 93%  
121 similarity). Although the two Neolithic strains were recovered from humans who had lived  
122 about two thousand years apart, they showed a higher genomic similarity to each other than to  
123 any other human or NHP genotype. Still, their genomes differed by 6% and may therefore be  
124 considered representatives of two separate clades. The genome from the 1000-year-old  
125 Petersberg individual clustered with modern D4 genotypes.

126 Owing to continuous recombination over time, different gene segments or modules of the  
127 ancestral genomes can show up in various subsequent virus generations. Such precursors have  
128 been postulated (Simmonds and Midgley, 2005) and their existence is supported by the results  
129 of our recombination analysis (figure supplementary S12-S15, source data 1). Some  
130 fragments of the Karsdorf sequences appeared to be very similar to modern human (G, E) and  
131 African NHP genotypes, and the Sorsum genome partially showed a high similarity to the  
132 human genotypes G, E and B. (figure supplementary S12-S13, S15, source data 1). Given the  
133 close relationship between the two Neolithic virus genomes, it is also conceivable that the  
134 older HBV from Karsdorf could have been a distant source for the younger Sorsum virus  
135 (figure supplementary S12-S13, S15, source data 1). The closer relationship between the  
136 Neolithic and the NHP strains compared to other human strains is noteworthy and may have  
137 involved reciprocal cross-species transmission at one or possibly several times in the past  
138 (Simmonds and Midgley, 2005, Souza et al., 2014, Rasche et al. 2016).

139 Taken together, our results demonstrate that HBV already existed in Europeans 7000 years  
140 ago and that its genomic structure closely resembled that of modern hepatitis B viruses. Both  
141 Neolithic viruses fall between the present-day modern human and the known NHP diversity.  
142 Therefore, it can be hypothesized that although the two Neolithic HBV strains are no longer  
143 observed today and thus may reflect two distinct clades that went extinct, they could still be  
144 closely related to the remote ancestors of the present-day genotypes, which is supported by  
145 signs of ancient recombination events. More ancient precursors, intermediates and modern  
146 strains of both humans and NHPs need to be sequenced to disentangle the complex evolution  
147 of HBV. As this evolution is characterized by recombination and point mutations and may  
148 further be complicated by human-ape host barrier crossing (Simmonds and Midgley, 2005,  
149 Souza et al., 2014, Rasche et al. 2016), genetic dating is not expected to yield meaningful  
150 results.

151 Based on our analysis, HBV DNA can reliably be detected in tooth samples that are up to  
152 7000 years old. Ancient HBV has so far only been identified in soft tissue from two 16<sup>th</sup>-  
153 century mummies (Kahila Bar-Gal et al., 2012, Patterson Ross et al., 2018). The aDNA

154 analysis of HBV from prehistoric skeletons, which facilitates evolutionary studies on a deeper  
155 temporal scale, has not been described up to now. One explanation for the difficulty of a  
156 molecular HBV diagnosis in bones is that the virus infection does not leave lesions on skeletal  
157 remains that would allow researchers to select affected individuals *a priori*, as it is the case  
158 for instance for leprosy (Schuenemann et al., 2013). The diagnosis of an HBV infection in  
159 skeletal populations is purely a chance finding and is thus more probable in a large-scale  
160 screening.

161 Overall, HBV biomolecules seem to be well preserved in teeth: We could reconstruct three  
162 HBV genomes by *de novo* assembly from shotgun data and even observed HBV-specific  
163 peptides. The ratio of HBV genomes to the human genome in our samples was rather high  
164 and similar in all three samples (Karsdorf 35:1, Sorsum 40.2:1 and Petersberg 16:1). As there  
165 is no evidence that HBV DNA is more resistant to postmortem degradation than human DNA,  
166 the high rate of HBV compared to human DNA may reflect the disease state in the infected  
167 individuals at the time of death. High copy numbers of viral DNA in the blood of infected  
168 individuals are associated with acute HBV infection, or reactivation of chronic HBV. Thus, it  
169 seems likely that the death of the ancient individuals is related to the HBV infection, but  
170 might not be the direct cause of death as fulminant liver failure is rather rare in modern day  
171 patients. The HBV infection might have instead contributed to other forms of lethal liver  
172 failure such as cirrhosis or liver cancer.

173

174 In view of the unexpected complexity of our findings, we envisage future diachronic HBV  
175 studies that go beyond the temporal and geographic scope of our current work.

176

177 **Materials and Methods**

178

179 ***Human remains***

180 The LBK settlement of **Karsdorf**, Saxony-Anhalt, Germany, is located in the valley of the  
181 river Unstrut. Between 1996-2010 systematic excavations were conducted at Karsdorf that led  
182 to the discovery of settlements and graves from the Neolithic to the Iron Age (Behnke, 2007,  
183 2011, 2012). The LBK is represented by 24 longhouses in north-west to south-east orientation  
184 that were associated with settlement burials (Veit, 1996). The investigated individual 537 is a  
185 male with an age at death of around 25-30 years (figure supplementary S1), dated to 5056–  
186 4959 cal BC (KIA 40357 – 6116 ± 32 BP) (Brandt et al., 2014, Nicklisch, 2017).

187 The gallery grave of **Sorsum**, Lower-Saxony, Germany, is typologically dated to the  
188 Tiefstichkeramik (group of the Funnelbeaker culture). Sorsum is exceptional as it was built  
189 into the bedrock. During the excavations (1956-1960) of the grave chamber around 105  
190 individuals were recovered (Claus, 1983, Czarnetzki, 1966). Individual XLVII 11 analyzed in  
191 this study is a male (figure supplementary S2) and dates to 3335-3107 cal BC (MAMS 33641  
192 – 4501 ± 19 BP).

193 The medieval cemetery on the **Petersberg/Kleiner Madron**, Bavaria, Germany, lies on a hill  
194 top at 850 meters asl and 400 meters above the floor of the Inn Valley. On the eastern part of  
195 the cemetery, which is under discussion here, members of a priory were buried that was most  
196 likely established in the late 10<sup>th</sup> century. Written sources document its existence from 1132  
197 onwards (Meier, 1998). During systematic excavations (1997-2004) in the southeastern part  
198 of the churchyard 99 graves with a higher, but hardly determinable number of individuals  
199 were uncovered. The examined individual in grave 820 is a male with an age at death of  
200 around 65-70 years (Lösch, 2009 - figure supplementary S3) dating to 1020-1116 cal AD  
201 (MAMS 33642 – 982 ± 17 BP).

202

203 ***DNA extraction and sequencing***

204 The DNA extractions and pre-PCR steps were carried out in clean room facilities dedicated to  
205 aDNA research. Teeth were used for the analyses. The samples from Petersberg and Sorsum  
206 were processed in the Ancient DNA Laboratory at Kiel University and the sample from  
207 Karsdorf in the Ancient DNA Laboratory of the Max Planck Institute for the Science of  
208 Human History (MPI SHH) in Jena. All procedures followed the guidelines on contamination  
209 control in aDNA studies (Warinner et al., 2017, Key et al., 2017). The teeth were cleaned in  
210 pure bleach solution to remove potential contaminations prior to powdering. Fifty milligrams



211 of powder were used for extraction following a silica-based protocol (Dabney et al., 2013).  
212 Negative controls were included in all steps.  
213 From each sample, double-stranded DNA sequencing libraries (UDGhalf) were prepared  
214 according to an established protocol for multiplex high-throughput sequencing (Meyer and  
215 Kircher, 2010). Sample-specific indices were added to both library adapters via amplification  
216 with two index primers. Extraction and library blanks were treated in the same manner. For  
217 the initial screening, the library of the individual from Karsdorf was sequenced on 1/50 of a  
218 lane on the HiSeq 3000 (2x75 bp) at the MPI SHH in Jena and the libraries from Petersberg  
219 and Sorsum were sequenced on the Illumina HiSeq 4000 (2x75 bp) platform at the Institute of  
220 Clinical Molecular Biology, Kiel University, using the HiSeq v4 chemistry and the  
221 manufacturer's protocol for multiplex sequencing. Deep-sequencing for each of the three  
222 samples was carried out on 2 lanes on the Illumina HiSeq 4000 platform at the Institute of  
223 Clinical Molecular Biology, Kiel University.

224

### 225 *Metagenomics data processing, screening, and analyses*

226 The datasets for the three ancient samples comprised paired-end reads. The adapter sequences  
227 were removed and overlapping paired-end reads were merged with ClipAndMerge which is a  
228 module of the EAGER pipeline (Peltzer et al., 2016). The metagenomic viral screening was  
229 carried out using MALT (Vagene et al., 2018) and the NCBI viral RefSeq database. All three  
230 samples showed HBV-specific reads. In order to obtain all HBV related sequencing reads we  
231 mapped against a multi-fasta reference containing one representative of each genotype (A-H)  
232 and eight ape strains using BWA (Li and Durbin, 2010) (table supplementary S6). Mapped  
233 reads were extracted from the BAM file, converted to FASTQ and a *de novo* assembly using  
234 SPAdes (Bankevich et al., 2012) was carried out. Resulting contigs for each K-value were  
235 checked and the k-value that spawned the longest contigs was selected as criteria for further  
236 analysis. The contigs were re-mapped with BWA against the multi-fasta reference. The  
237 resulting alignment was visually inspected in IGV v 2.3.92 (Thorvaldsdóttir et al., 2013) to  
238 archive information about contig order and direction. Based on that information, a consensus  
239 sequence was constructed from the contigs.

240 We assembled a comprehensive set of reference genomes using 5497 non-recombinant  
241 genomes available at hvpdb (<https://hbvdb.ibcp.fr/HBVdb/HBVdbDataset?seqtype=0>) and a  
242 previously defined set of 74 ape-infecting HBV genomes. In order to reduce the actual  
243 number of genomes used for subsequent inferences but retain the full range of known HBV  
244 diversity, we clustered all sequences using UClust v 1.1.579 (Edgar et al., 2010). We

245 extracted the centroid sequences based on a sequence identity of at least 97%, which resulted  
246 in 495 representative genomes. Those genomes together with all available ancient genomes  
247 were aligned using Geneious version 10.1.2 (Kearse et al., 2012) with a 65% similarity cost  
248 matrix, a gap open penalty of 12 and a gap extension penalty of 3. The multiple sequence  
249 alignment was stripped of any sites (columns) that had gaps in more than 95% of sequences.  
250 The complete alignment including all modern and ancient genomes is available as multi-fasta  
251 in source data 2. The alignment was used to construct a network with the software SplitsTree  
252 v4 (Huson and Bryant, 2006), creating a NeighborNet (Bryant and Moulton, 2004) with  
253 uncorrected P distances.

254

### 255 ***Recombination analysis***

256 We performed recombination analysis using all modern full reference genomes (n=495) and  
257 five ancient genomes used for the network analysis (see above). The methods RDP,  
258 GENECOV, Chimera, MaxChi, BootScan, SiScan, 3Seq within RDP v4 (Martin et al., 2015)  
259 with a window size of 100 nt and the parameter set to circular genome with and without  
260 outgroup reference (results are provided in source data 1) and SimPlot v 3.5.1 (Lole et al.  
261 1999, figure supplement S12-S15) were applied to the data set.

262

### 263 ***Human population genetic analyses***

264 Mapping of the adapter-clipped and merged FASTQ files to the human reference genome  
265 hg19 was done using BWA (Li and Durbin, 2010) using a reduced mapping stringency of “-n  
266 0.01” and the mapping quality parameter “q 30”. The mapped sequencing data was  
267 transformed into the *Eigenstrat* format (Price et al., 2006) and merged with a dataset of  
268 1.233.013 SNPs (Haak et al., 2015, Mathieson et al., 2015). Using the software Smartpca  
269 (Patterson et al., 2006) the three samples and previously published ancient populations were  
270 projected onto a base map of genetic variation calculated from 32 West Eurasian populations  
271 (figure supplement S9-S11).

272

### 273 ***Sex determination***

274 Sex determination was assessed based on the ratio of sequences aligning to the X and Y  
275 chromosomes compared to the autosomes (Skoglund et al., 2013).

276

### 277 ***LC-MS based bottom-up proteomics***

278 Proteins were extracted from powdered tooth samples (50 mg) using a modified filter-aided  
279 sample preparation (FASP) protocol as previously described (Cappellini et al., 2013,  
280 Warinner et al., 2014). Samples were digested using trypsin and analyzed by LC-MS/MS.  
281 Protein identification was performed using the SequestHT (Thermo Scientific) search engine  
282 in a combined database comprising the full Swiss protein database (468,716 entries), a  
283 hepatitis B data base (7 entries) and a common contaminant list. Further details regarding the  
284 LC-MS/MS analysis and database search parameters are given in the supplementary  
285 information and figure supplementary S16.  
286

287 **Acknowledgements**

288 We are grateful to the following people and institutions for providing samples, support, and  
289 advice: Bodo Krause-Kyora, Hildegard Nelson (Referat A1 Archäologische Dokumentation,  
290 Niedersächsisches Landesamt für Denkmalpflege), Ulrike Weller (Sammlungsverwaltung  
291 Archäologie Landesmuseum Hannover) and Britta Steer for technical assistance with  
292 proteomics sample preparation.

293 This work was supported by the Collaborative Research Centre 1266 *Scales of*  
294 *Transformation*, the Excellence Cluster 306 *Inflammation at Interfaces*, the Medical Faculty  
295 of Kiel University, the Max Planck Society and the European Research Council (ERC)  
296 starting grant APGREID (to J.K.). Excavations and analysis of the archaeological site of  
297 Karsdorf were supported by the German Research Foundation (DFG) Grant of Kurt W. Alt  
298 (Al 287-7-1) and Harald Meller (Me 3245/1-1).

299

300 **Declaration of interests**

301 All other authors declare that they have no conflicts of interest.

302

303 **Accession numbers**

304 Raw sequence read files have been deposited at the European Nucleotide Archive under  
305 accession no. PRJEB24921

306

307 **References**

- 308
- 309 Araujo NM. 2015. Hepatitis B virus intergenotypic recombinants worldwide: An overview. *Infect*
- 310 *Genet Evol.* 36:500-510. DOI: 10.1016/j.meegid.2015.08.024. PMID: 26299884
- 311
- 312 Bankevich A, Nurk S, Antipov D, Gurevich AA, Dvorkin M, Kulikov AS, Lesin VM, Nikolenko SI,
- 313 Pham S, Prjibelski AD, Pyshkin AV, Sirotkin AV, Vyahhi N, Tesler G, Alekseyev MA, Pevzner PA.
- 314 2012. SPAdes: a new genome assembly algorithm and its applications to single-cell sequencing. *J*
- 315 *Comput Biol.*19:455-477. doi: 10.1089/cmb.2012.0021. PMID: 22506599
- 316
- 317 Behnke HJ. 2007. Sußes aus der Bronzezeit – Siedlungsgunst im Unstruttal bei Karsdorf,
- 318 Burgenlandkreis. *Die Ausgrabungen 2004. Archäologie in Sachsen-Anhalt N.F. 4.* 63-86.
- 319
- 320 Behnke HJ. 2011. Erste Siedler der Linienbandkeramik in der Karsdorfer Feldflur. *Ergebnisse der*
- 321 *Ausgrabungen im Jahr 2005. Archäologie in Sachsen-Anhalt N.F. 5.* 184-199.
- 322
- 323 Behnke HJ. 2012. Siedlungsgunst im Unstruttal bei Karsdorf, Burgenlandkreis: Ergebnisse der
- 324 Grabungen 2006 und 2007. *Archäologie in Sachsen-Anhalt N.F.6.* 35-70.
- 325
- 326 Bouckaert R, Alvarado-Mora MV, Pinho JR. 2003. Evolutionary rates and HBV: issues of rate
- 327 estimation with Bayesian molecular methods. *Antiviral Therapy* 18:497-503 DOI: 10.3851/IMP2656.
- 328 PMID: 23792904
- 329
- 330 Brandt G, Knipper C, Nicklisch N, Ganslmeier R, Klamm M, Alt KW. 2014. Settlement burials at the
- 331 Karsdorf LBK site, Saxony-Anhalt, Germany - biological ties and residential mobility. In: A. Whittle,
- 332 Penny Bickle (eds) *Early farmers. The view from archaeology und Science.* Oxford University Press,
- 333 British Academy, 95-114.
- 334
- 335 Bryant D, Moulton V. 2004. Neighbor-net: an agglomerative method for the construction of
- 336 phylogenetic networks. *Mol Biol Evol.* 2004 Feb;21(2):255-65. DOI:
- 337 <https://doi.org/10.1093/molbev/msh018>. PMID: 14660700
- 338
- 339 Cappellini E, Gentry A, Palkopoulou E, Ishida Y, Cram D, Roos AM, Watson M, Johansson US,
- 340 Fernholm B, Agnelli P, Barbagli F, Littlewood DTJ, Kelstrup ChD, Olsen JV, Lister AM, Roca AL,
- 341 Dalén L, Gilbert MT. 2013. Resolution of the type material of the Asian elephant, *Elephas maximus*
- 342 *Linnaeus, 1758 (Proboscidea, Elephantidae).* *Zoological Journal of the Linnean Society.* 170:222–232.
- 343 DOI: 10.1111/zoj.12084
- 344
- 345 Castelhana N, Araujo NM, Arenas M. 2017. Heterogeneous recombination among Hepatitis B virus
- 346 genotypes. *Infection, Genetics and Evolution* 54:486-490. DOI: 10.1016/j.meegid.2017.08.015,
- 347 PMID: 28827173
- 348
- 349 Czarnetzki A. 1966. Die menschlichen Skelettreste aus vier neolithischen Steinkisten Hessens und
- 350 Niedersachsens.
- 351
- 352 Claus M. 1983. Das neolithische Felsenkammergrab auf dem Halsberg bei Sorsum, Stadt Hildesheim.
- 353 *Die Kunde N. F.* 34/35, 1983/84, 91-122.
- 354
- 355 Dabney J, Knapp M, Glocke I, Gansauge MT, Weihmann A, Nickel B, Valdiosera C, García N, Pääbo
- 356 S, Arsuaga JL, Meyer M. 2013. Complete mitochondrial genome sequence of a Middle Pleistocene
- 357 cave bear reconstructed from ultrashort DNA fragments. *Proc Natl Acad Sci USA.*110:15758-63. DOI:
- 358 10.1073/pnas.1314445110. PMID: 24019490
- 359
- 360 Edgar RC. 2010. Search and clustering orders of magnitude faster than BLAST. *Bioinformatics.*
- 361 26:2460-1. DOI: 10.1093/bioinformatics/btq461. PMID: 20709691

362  
363 Haak W, Lazaridis I, Patterson N, Rohland N, Mallick S, Llamas B, Brandt G, Nordenfelt S, Harney  
364 E, Stewardson K, Fu Q, Mittnik A, Bánffy E, Economou C, Francken M, Friederich S, Pena RG,  
365 Hallgren F, Khartanovich V, Khokhlov A, Kunst M, Kuznetsov P, Meller H, Mochalov O, Moiseyev  
366 V, Nicklisch N, Pichler SL, Risch R, Rojo Guerra MA, Roth C, Szécsényi-Nagy A, Wahl J, Meyer M,  
367 Krause J, Brown D, Anthony D, Cooper A, Alt KW, Reich D. 2015. Massive migration from the  
368 steppe was a source for Indo-European languages in Europe. *Nature*. 522:207-211. DOI:  
369 10.1038/nature14317. PMID: 25731166  
370  
371 Huson DH, Bryant D. 2006. Application of Phylogenetic Networks in Evolutionary Studies.  
372 *Molecular Biology and Evolution*. 23:254-267. PMID: 16221896  
373  
374 Kahila Bar-Gal G, Kim MJ, Klein A, Shin DH, Oh CS, Kim JW, Kim TH, Kim SB, Grant PR, Pappo  
375 O, Spigelman M, Shouval D. 2012. Tracing hepatitis B virus to the 16th century in a Korean mummy.  
376 *Hepatology* 56:1671-80. DOI: 10.1002/hep.25852. PMID: 22610996  
377  
378 Kearse M, Moir R, Wilson A, Stones-Havas S, Cheung M, Sturrock S, Buxton S, Cooper A,  
379 Markowitz S, Duran C, Thierer T, Ashton B, Mentjies P, Drummond A. 2012. Geneious Basic: an  
380 integrated and extendable desktop software platform for the organization and analysis of sequence  
381 data. *Bioinformatics*. 28,1647-1649. DOI: 10.1093/bioinformatics/bts199. PMID: 22543367  
382  
383 Key FM, Posth C, Krause J, Herbig A, Bos KI. 2017. Mining Metagenomic Data Sets for Ancient  
384 DNA: Recommended Protocols for Authentication. *Trends Genet*. 33:508-520. DOI:  
385 10.1016/j.tig.2017.05.005. Epub 2017 Jul 5. PMID: 28688671  
386  
387 Li H, Durbin R. 2010. Fast and accurate long-read alignment with Burrows-Wheeler transform.  
388 *Bioinformatics*. 26:589-95. DOI: 10.1093/bioinformatics/btp698. PMID: 20080505  
389  
390 Littlejohn M, Locarnini S, Yuen L. 2016. Origins and Evolution of Hepatitis B Virus and Hepatitis D  
391 Virus. *Cold Spring Harb Perspect Med*. 6:a021360. DOI: 10.1101/cshperspect.a021360, PMID:  
392 26729756  
393  
394 Lösch S. 2009. Paläopathologisch-anthropologische und molekulare Untersuchungen an  
395 mittelalterlichen und frühneuzeitlichen Bevölkerungsgruppen. Dissertation zum Erwerb des  
396 Doktorgrades der Humanbiologie an der Medizinischen Fakultät der Ludwig-Maximilians-Universität  
397 zu München.  
398  
399 Lole KS, Bollinger RC, Paranjape RS, Gadhari D, Kulkarni SS, Novak NG, Ingersoll R, Sheppard  
400 HW, Ray SC. 1999. Full-length human immunodeficiency virus type 1 genomes from subtype C-  
401 infected seroconverters in India, with evidence of intersubtype recombination. *J Virol*. 73:152-60.  
402 PMID: 9847317  
403  
404 Martin DP, Murrell B, Golden M, Khoosal A, Muhire B. 2015. RDP4: Detection and analysis of  
405 recombination patterns in virus genomes. *Virus Evolution* 1:vev003. DOI: 10.1093/ve/vev003. PMID:  
406 27774277  
407  
408 Mathieson I, Lazaridis I, Rohland N, Mallick S, Patterson N, Roodenberg SA, Harney E, Stewardson  
409 K, Fernandes D, Novak M, Sirak K, Gamba C, Jones ER, Llamas B, Dryomov S, Pickrell J, Arsuaga  
410 JL, de Castro JM, Carbonell E, Gerritsen F, Khokhlov A, Kuznetsov P, Lozano M, Meller H,  
411 Mochalov O, Moiseyev V, Guerra MA, Roodenberg J, Vergès JM, Krause J, Cooper A, Alt KW,  
412 Brown D, Anthony D, Lalueza-Fox C, Haak W, Pinhasi R, Reich D. 2015 Genome-wide patterns of  
413 selection in 230 ancient Eurasians. *Nature*. 528:499-503. DOI: 10.1038/nature16152. PMID:  
414 26595274  
415

- 416 Meier T. 1998. Ein mittelalterliches Kloster mit Friedhof auf dem Kleinen Madron/Petersberg bei  
417 Flintsbach a. Inn. Landkreis Rosenheim, Oberbayern. *Das Archäologische Jahr in Bayern* 1998: 127-  
418 129.
- 419
- 420 Meyer M, Kircher M. 2010. Illumina sequencing library preparation for highly multiplexed target  
421 capture and sequencing. *Cold Spring Harb. Protoc.* 2010:pdb.prot5448. DOI: 10.1101/pdb.prot5448.  
422 PMID: 20516186
- 423
- 424 Nicklisch N. 2017. Spurensuche an Skeletten. Paläodemografische und epidemiologische  
425 Untersuchungen an neolithischen und frühbronzezeitlichen Bestattungen aus dem Mittel-  
426 gebiet im Kontext populationsdynamischer Prozesse. *Forschungsberichte des Landesmuseums für*  
427 *Vorgeschichte Halle*, Band 11.
- 428
- 429 Patterson N, Price AL, Reich D. 2006. Population structure and eigenanalysis.  
430 *PLoS Genet.* 2:e190. PMID: 17194218
- 431
- 432 Patterson Ross Z, Klunk J, Fornaciari G, Giuffra V, Duchêne S, Duggan AT, Poinar D, Douglas MW,  
433 Eden JS, Holmes EC, Poinar HN. 2018. The paradox of HBV evolution as revealed from a 16th  
434 century mummy. *PLoS Pathog.* 4;14:e1006750. DOI: 10.1371/journal.ppat.1006750. PMID:  
435 29300782
- 436
- 437 Peltzer A, Jäger G, Herbig A, Seitz A, Kniep C, Krause J, Nieselt K. 2016. EAGER: efficient ancient  
438 genome reconstruction. *Genome Biol.* 17:60. DOI: 10.1186/s13059-016-0918-z. PMID: 27036623
- 439
- 440 Price AL, Patterson NJ, Plenge RM, Weinblatt ME, Shadick NA, Reich D. 2006. Principal  
441 components analysis corrects for stratification in genome-wide association studies. *Nat Genet.* 38:904-  
442 909. PMID: 16862161
- 443
- 444 Rasche A, Souza BFCD, Drexler JF. 2016. Bat hepadnaviruses and the origins of primate hepatitis B  
445 viruses. *Curr Opin Virol.* 16:86-94. DOI: 10.1016/j.coviro.2016.01.015. PMID: 26897577
- 446
- 447 Schaefer S. 2007. Hepatitis B virus taxonomy and hepatitis B virus genotypes. *World J Gastroenterol.*  
448 13:14-21. PMID: 17206751
- 449
- 450 Schuenemann VJ, Singh P, Mendum TA, Krause-Kyora B, Jäger G, Bos KI, Herbig A, Economou C,  
451 Benjak A, Busso P, Nebel A, Boldsen JL, Kjellström A, Wu H, Stewart GR, Taylor GM, Bauer P, Lee  
452 OY, Wu HH, Minnikin DE, Besra GS, Tucker K, Roffey S, Sow SO, Cole ST, Nieselt K, Krause J.  
453 2013 Genome-wide comparison of medieval and modern *Mycobacterium leprae*. *Science.* 341:179-  
454 183. DOI: 10.1126/science.1238286. PMID: 23765279
- 455
- 456 Simmonds P, Midgley S. 2005. Recombination in the genesis and evolution of hepatitis B virus  
457 genotypes. *J Virol.* 79:15467-76. DOI: 10.1128/JVI.79.24.15467-15476.2005, PMID: 16306618
- 458
- 459 Skoglunda P, Storå J, Götherström A, Jakobsson M. 2013. Accurate sex identification of ancient  
460 human remains using DNA shotgun sequencing. *Journal of Archaeological Science.* 12:4477-4482.  
461 DOI: <https://doi.org/10.1016/j.jas.2013.07.004>
- 462
- 463 Souza BF, Drexler JF, Lima RS, Rosário Mde O, Netto EM. 2014. Theories about evolutionary origins  
464 of human hepatitis B virus in primates and humans. *Braz J Infect Dis.* 18:535-43. DOI:  
465 10.1016/j.bjid.2013.12.006, PMID: 24726560
- 466
- 467 Thorvaldsdóttir H, Robinson JT, Mesirov JP. 2013. Integrative Genomics Viewer (IGV): high-  
468 performance genomics data visualization and exploration. *Brief Bioinform.* 14:178-192. DOI:  
469 10.1093/bib/bbs017. PMID: 22517427
- 470

471 Vågene ÅJ, Herbig A, Campana MG, Robles García NM, Warinner C, Sabin S, Spyrou MA,  
472 Andrades Valtueña A, Huson D, Tuross N, Bos KI, Krause J. 2018. Salmonella enterica genomes from  
473 victims of a major sixteenth-century epidemic in Mexico. *Nat Ecol Evol*.2:520-528. DOI:  
474 10.1038/s41559-017-0446-6. PMID: 29335577  
475  
476 Veit U. 1996. Studien zum Problem der Siedlungsbestattungen im europäischen Neolithikum,  
477 München, New York: Waxmann  
478  
479 Warinner C, Rodrigues JF, Vyas R, Trachsel C, Shved N, Grossmann J, Radini A, Hancock Y, Tito  
480 RY, Fiddymment S, Speller C, Hendy J, Charlton S, Luder HU, Salazar-García DC, Eppler E, Seiler R,  
481 Hansen LH, Castruita JA, Barkow-Oesterreicher S, Teoh KY, Kelstrup CD, Olsen JV, Nanni P, Kawai  
482 T, Willerslev E, von Mering C, Lewis CM Jr, Collins MJ, Gilbert MT, Rühli F, Cappellini E. 2014.  
483 Pathogens and host immunity in the ancient human oral cavity. *Nat Genet*. 46:336-44. DOI:  
484 10.1038/ng.2906. PMID: 24562188  
485  
486 Warinner C, Herbig A, Mann A, Fellows Yates JA, Weiß CL, Burbano HA, Orlando L, Krause J.  
487 2017. A Robust Framework for Microbial Archaeology. *Annu Rev Genomics Hum Genet*. 18:321-  
488 356. DOI: 10.1146/annurev-genom-091416-035526. PMID: 28460196  
489  
490 WHO, Global hepatitis report, 2017  
491  
492 Zhou Y, Holmes EC. 2007. Bayesian estimations of the evolutionary rate and age of hepatitis B virus.  
493 *J Mol Evol* 65:197-205. DOI:10.1007/s00239-007-0054-1, PMID: 17684696  
494  
495



496 **Figure Legends**

497

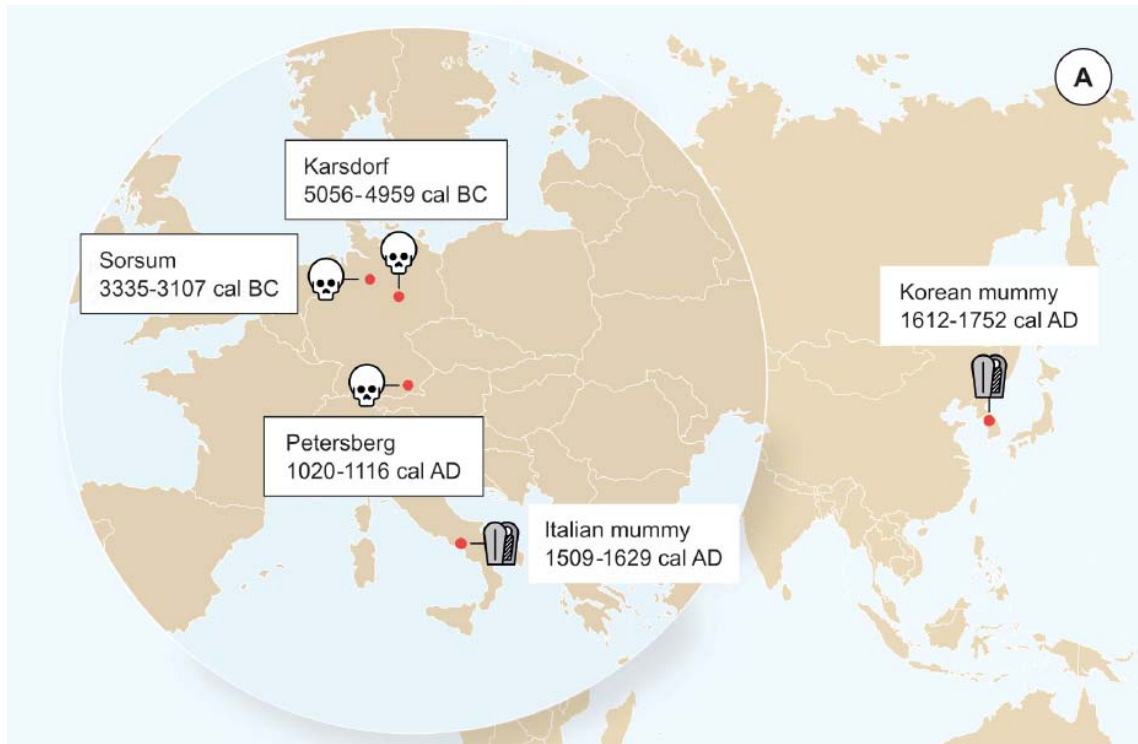

498

499 **Fig A. Origin of samples**

500 Geographic location of the samples from which ancient HBV genomes were isolated.

501 Radiocarbon dates of the specimens is given in 2 sigma range. Icon indicate the sample

502 material (tooth or mummy). HBV genomes obtained in this study indicated by black frame.

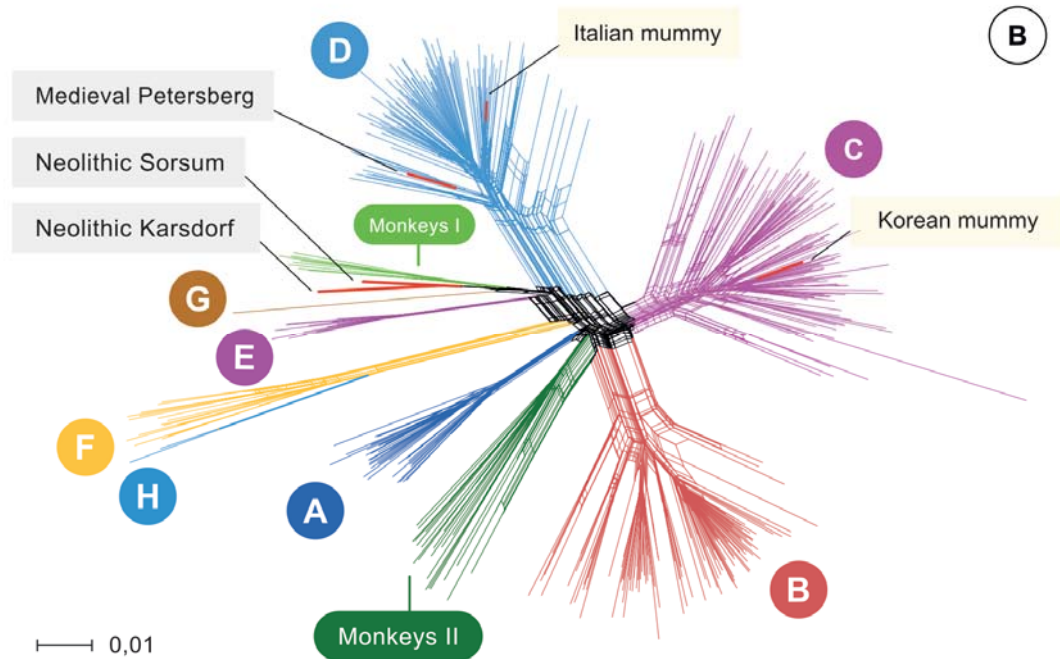

503

504 **Fig B Network**

505 Network of 495 modern, two published ancient genomes (light yellow box), and three ancient  
506 hepatitis B virus (HBV) obtained in this study (grey box). Colors indicating the 8 human  
507 HBV Genotypes (A-H), two monkey genotypes (Monkeys I, African apes and Monkeys II,  
508 Asian monkeys) and ancient genomes (red).

509

510

## Tables

**Table 1.** Results of the genome reconstruction.

|                   | # Merged reads | Length of HBV consensus sequence | mean HBV coverage | Gaps in the consensus sequence at nt position                    | # mapped reads HBV | # mapped reads human | mean human coverage | human genomes/ HBVgenomes |
|-------------------|----------------|----------------------------------|-------------------|------------------------------------------------------------------|--------------------|----------------------|---------------------|---------------------------|
| <b>Karsdorf</b>   | 386,780,892    | 3183                             | 104X              | 2157-2175;<br>3107-3128;<br>3133-3183                            | 10,718             | 122,568,310          | 2.96X               | 1 : 35.1                  |
| <b>Sorsum</b>     | 367,574,767    | 3182                             | 47X               | -                                                                | 3,249              | 9,856,001            | 1.17X               | 1 : 40.2                  |
| <b>Petersberg</b> | 419,413,082    | 3161                             | 46X               | 880-1000;<br>1232-1329;<br>1331-1415;<br>1420-1581;<br>1585-1598 | 2,125              | 105,476,677          | 2.88X               | 1 : 16                    |

# - number

nt - nucleotide
